# The impact of COVID-19 on the oral health needs of children participating in a school-based dental program

Ryan Richard Ruff, PhD, MPH<sup>1 2 \*</sup>, Tamarinda Barry Godín, DDS, MPH<sup>1</sup>, Rachel Whittemore, MPH<sup>1</sup>, Topaz Murray Small, MPA<sup>1</sup>, Nydia Santiago-Galvin, RN, MPH<sup>1</sup>, and Priyanka Sharma, RDH<sup>1</sup>

<sup>1</sup>New York University College of Dentistry

<sup>2</sup>New York University School of Global Public Health

\*Corresponding author

April 2022

## Abstract

*Background:* Children with dental caries (tooth decay), the world’s most prevalent noncommunicative disease, face negative impacts on health and quality of life. School-based caries prevention can increase access to care and reduce health inequities. *Methods:* The CariedAway project was a school-based oral health program and pragmatic clinical trial of minimally-invasive treatments for dental caries. We present data on disease severity and the impacts of the COVID-19 pandemic on the urgent dental needs of high-risk children. *Results:* 4718 subjects were randomized and treated prior to the COVID-19 pandemic and 1398 completed their first follow-up observation after two years, during which the project was suspended due to infection control policies. Approximately 30% had untreated caries on any dentition at baseline and only 11% of children presented with evidence of having received preventive dental sealants. After 24 months, 4% of children had developed fistula and nearly 10% presented with pulpal involvement. *Conclusion:* There are severe unmet needs in minority urban children that are further exacerbated by a lack of access to care during disease outbreaks. School-based programs using essential medicines can provide lasting care during pandemic periods.

## 1 Introduction

Coined the “silent epidemic” [1], the World Health organization classifies untreated dental caries as the most common noncommunicative disease in the

world [2]. Children with untreated caries can experience systemic infection [3], lower quality of life [4], and reduced academic performance and school attendance [5]. Inequities in oral disease are a reflection of disparities in access to dental care, as those most at risk have the lowest rates of service utilization [6].

The onset of COVID-19 had a considerable impact on the dental profession. Visits to US dental offices substantially declined [7], with many offices open only for emergency services or with the implementation of stringent infection control procedures. Similarly, there was a reduction in routine oral health care and preventive practice with a subsequent increase in emergency care, which may have resulted in widening healthcare disparities in vulnerable populations [8].

School-Based Health Centers (SBHCs) increase access to critical health services for children [9], including primary and preventive medical care [10]. For oral health, the Centers for Disease Control and Prevention recommends school sealant programs [11], and other approaches to school-based dental care are similarly effective [12]. Closures of SBHCs and other school health programs to mitigate the spread of the pandemic meant that these vital services for children were inaccessible [13, 14].

The CariedAway project was a school-based oral health program and research initiative operating in New York City from 2019 to 2023. Similar to other SBHCs, CariedAway was suspended during the COVID-19 pandemic. In this paper, we report on the incidence of severe disease in children participating in a school-based dental program after COVID-19.

## 2 Methods

The CariedAway project was a school-based dental program and randomized clinical trial designed to test the non-inferiority of silver diamine fluoride and fluoride varnish compared to glass ionomer sealants/atraumatic restorations and fluoride varnish in the longitudinal arrest and prevention of dental caries. Secondary outcomes included oral health-related quality of life, the role of school nurses in dental care, and the impacts on academic performance. As a cluster randomized trial, schools were randomly allocated to receive each intervention using a random number generator. CariedAway was specifically conducted in schools to assess interventions in a pragmatic setting. The trial is registered at [www.clinicaltrials.gov](http://www.clinicaltrials.gov) (#NCT03442309, date of registration 22/02/2018), received IRB approval from the New York School of Medicine Institutional Review Board (#i17-00578), and has a published study protocol [15]. All research in CariedAway was performed in accordance with the Declaration of Helsinki.

### 2.1 Inclusion and Exclusion Criteria

Any primary schools in New York City with a student population consisting of at least 50% Hispanic/Latino or black ethnicities and at least 80% receiving free or reduced lunch were eligible to participate. The latter criteria was used as a proxy for low socio-economic status. Schools were further ineligible if they

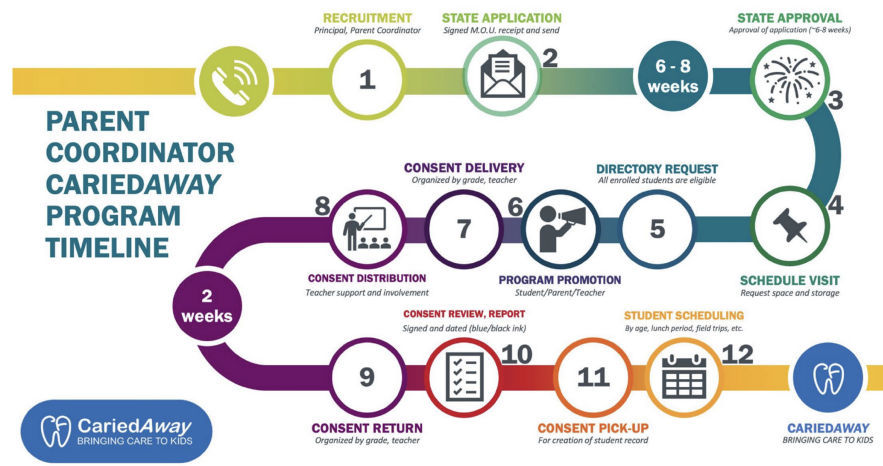

Figure 1: Recruitment and enrollment procedure for CariedAway

had a preexisting SBHC-D operating within the school. All students in enrolled schools were eligible for the study if they provided parental informed consent and child assent.

## 2.2 Enrollment

As a school-based, pragmatic clinical trial, CariedAway included a detailed recruitment and enrollment procedure (Figure 1). Study investigators first met with the principal and parent coordinator at each school, after which a memo of understanding was signed by school administrators to participate in the study. In New York, state approval is required to provide dental care in schools, so applications were submitted to the New York State Department of Health to serve as the sole oral healthcare provider for each school. Following state approval, initial baseline visits were scheduled with each school and consents were distributed to school personnel. During consent delivery, study investigators conducted program promotion in each school, consisting of tabling sessions, informational letters for parents, and presenting at parent-teacher conferences. After two weeks, consents were collected and subjects were enrolled and received their assigned treatment.

## 2.3 Diagnosis and Treatment

Specific protocols for dental screening, assessment, and treatment were created for the CariedAway manual of procedures. Full description of these protocols are included as supplementary appendices. Briefly, all participants received a full visual-tactile dental screening or assessment using standardized dental hygienists or registered nurses while under the supervision of a licensed pediatric

dentist. Caries were diagnosed using the International Caries Detection and Assessment System (ICDAS) adapted criteria in epidemiology and clinical research [16]. Clinicians wore headlamps and used portable dental chairs.

Participants in the experimental arm received fluoride varnish (5% NaF, Colgate PreviDent) on all teeth and a 38% application of silver diamine fluoride (Elevate Oral Care Advantage Arrest 38%, 2.24 F-ion mg/dose) for asymptomatic cavitated lesions of the posterior dentition. Participants in the active comparator received an identical application of fluoride varnish as well as glass ionomer sealants (GC Fuji IX, GC America) to the pits and fissures of bicuspids and molars, and ART on any asymptomatic cavitated lesions.

Table 1: Sample demographics and descriptives (N=1398)

|                 | Overall |        |
|-----------------|---------|--------|
|                 | N/Mean  | % / SD |
| Subjects        | 1398    | 100    |
| Female          | 753     | 53.86  |
| Race            |         |        |
| Hispanic        | 679     | 48.85  |
| Black           | 208     | 14.96  |
| White           | 29      | 2.09   |
| Asian           | 24      | 1.73   |
| Multiple        | 20      | 1.44   |
| Other           | 11      | 0.79   |
| DK/Missing      | 419     | 30.14  |
| Age at baseline | 6.63    | 1.21   |

## 2.4 Outcomes

Outcomes for this analysis include caries prevalence, sealant prevalence, and severe pathology. For the prevalence of untreated decay, treated dentition, and dental sealants, each were included as a dichotomous variable. Any instance of decay on any tooth, treated dentition on any tooth, or a sealant on any tooth was considered present for the individual subject. We also include data on the total number of teeth with untreated decay and the total decayed/missing/filled teeth and tooth surfaces (DMFS/DMFT) for both deciduous and permanent dentition. For critical needs presenting after COVID-19, we present data on both the prevalence (yes/no) and total number of teeth with fistula, pulpal involvement, and swelling.

## 2.5 Statistical Analysis

We first describe the baseline oral health status of participants in CariedAway by generating descriptive statistics (means, standard deviations, percents) for

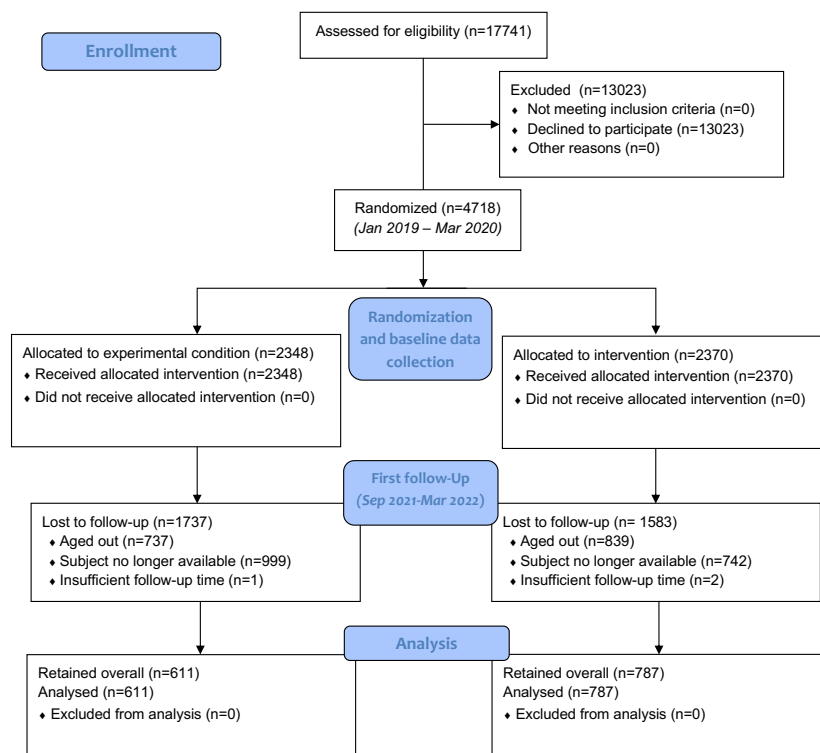

Figure 2: Study flow diagram for the CariedAway randomized controlled trial

the analytic sample for participant demographics, caries and disease severity, evidence of outside dental care (both treatment and prevention), and pathology at first follow-up. Analysis was stratified where appropriate by age and race/ethnicity. Oral health variables were calculated and reported separately (permanent dentition, primary dentition, and occlusal first molars where appropriate) and for caries experience (including cavities and restorations), untreated carious teeth and tooth surfaces, fissure sealants, and the decayed/missing/filled index for whole teeth and tooth surfaces. Differences across sociodemographic groups for disease severity and evidence of preventive care at baseline were evaluated using logistic regression. To explore the impact of COVID-19 on the oral health needs of children, we calculated the cumulative incidence of dental caries, as well as any swelling, fistula, or pulpal involvement, for all subjects and by treatment group. Statistical significance was set at  $p < .05$ . Analysis was conducted using R v1.4.

### 3 Results

Prior to the COVID-19 suspension, 4718 subjects were enrolled, randomized, and received their assigned treatment. We completed follow-up observations in 1398 subjects after two years when the study resumed (Figure 2). Sample demographics and descriptive statistics for CariedAway (Table 1) show that approximately 54% of the sample was female and 64% were of either black or Hispanic/Latino race/ethnicity. The average age at baseline was 6.63 years ( $SD=29.54$ ).

For disease severity (Table 2), the overall prevalence of untreated caries was 29.5%, predominantly found in the primary dentition. Approximately 19% had untreated caries on 1 or 2 teeth, 9% 3-5 teeth, and 23 subjects had decay on six or more. When stratified by race/ethnicity, decay was consistent, ranging from 27% in Hispanic/Latino participants to 34% in whites. Across the entire sample, the average number of decayed, missing, or filled primary teeth was 1.24 ( $SD=2.04$ ) and surfaces (dmfs) was 3.42 ( $SD=6.43$ ). When stratified by school (minimum school size of 10 subjects), the untreated caries prevalence ranged from was 8% to 48% (data not shown).

Approximately 27% of subjects presented at baseline with evidence of treated dentition (Table 2), showing they had previously seen a dentist for care. However the baseline sealant prevalence, indicating prior preventive care, was only 11%. Filling prevalence, in contrast, was 20%. Stratified by race, sealant prevalence was lowest in black (7%) and Asian (8%) children, compared to 12% in Hispanics/Latinos and 14% in whites. Logistic regression results for baseline disease and unmet needs (Table 3) indicate that there were no differences in untreated decay prevalence by race/ethnicity or sex. The odds of decay slightly increased with age ( $OR = 1.11$ , 95%  $CI = 1.01, 1.22$ ). Age also was significantly associated with sealant prevalence ( $OR = 1.85$ , 95%  $CI = 1.59, 2.15$ ). Black children presented with 46% reduced odds of having sealants compared to Hispanics ( $OR = 0.54$ , 95%  $CI = 0.30, 0.96$ ) but no other group was significant.

Table 2: Oral health at baseline (N=1398)

|                             | N    | % (total) |
|-----------------------------|------|-----------|
| Untreated decay, overall    | 413  | 29.54     |
| Decay, occlusal first molar | 26   | 1.86      |
| Decay, deciduous            | 401  | 28.68     |
| Decay, permanent            | 30   | 2.15      |
| Total decayed teeth         |      |           |
| 0                           | 985  | 70.46     |
| 1-2                         | 269  | 19.24     |
| 3-5                         | 121  | 8.66      |
| 6-8                         | 22   | 1.57      |
| 8+                          | 1    | 0.07      |
| Decay by age                |      |           |
| 5                           | 78   | 18.89     |
| 6                           | 106  | 25.67     |
| 7                           | 102  | 24.70     |
| 8                           | 103  | 24.94     |
| 9                           | 23   | 5.57      |
| 10                          | 1    | 0.24      |
| Decay by race/ethnicity     |      |           |
| Hispanic                    | 183  | 44.31     |
| Black                       | 67   | 16.22     |
| White                       | 10   | 2.42      |
| Asian                       | 8    | 1.94      |
| Other                       | 7    | 1.69      |
| Unreported                  | 138  | 33.41     |
| Treated dentition           | 374  | 26.75     |
| Sealant prevalence          | 156  | 11.16     |
| Filling prevalence          | 288  | 20.6      |
| Sealant by race             |      |           |
| Hispanic                    | 83   | 0.12      |
| Black                       | 15   | 0.07      |
| White                       | 4    | 0.14      |
| Asian                       | 2    | 0.08      |
| Other                       | 2    | 0.06      |
| Unreported                  | 50   | 0.12      |
|                             | X    | SD        |
| DMFT                        | 0.54 | 0.3       |
| DMFS                        | 0.79 | 0.49      |
| dmft                        | 1.24 | 2.04      |
| dmfs                        | 3.42 | 6.43      |

Table 3: Differences in baseline disease severity and unmet needs (N=1398)

|            | Untreated decay |            | Sealant present |            |
|------------|-----------------|------------|-----------------|------------|
|            | OR              | 95% CI     | OR              | 95% CI     |
| Race       |                 |            |                 |            |
| Black      | 1.29            | 0.92, 1.80 | 0.54            | 0.30, 0.96 |
| White      | 1.47            | 0.67, 3.22 | 1.41            | 0.47, 4.27 |
| Asian      | 1.42            | 0.60, 3.39 | 0.79            | 0.18, 3.56 |
| Multiple   | 0.87            | 0.31, 2.44 | 0.35            | 0.44, 2.71 |
| Other      | 0.59            | 0.13, 2.75 | 0.6             | 0.73, 4.85 |
| Unreported | 1.31            | 1.00, 1.70 | 0.98            | 0.67, 1.44 |
| Age        | 1.11            | 1.01, 1.22 | 1.85            | 1.59, 2.15 |
| Females    | 0.89            | 0.71, 1.13 | 1.15            | 0.81, 1.62 |

Table 4: Critical need after twenty-four months (N=1398)

|                                | N   | %     |
|--------------------------------|-----|-------|
| Fistula (any)                  | 61  | 4.36  |
| Fistula (number)               |     |       |
| 1                              | 52  | 3.72  |
| 2                              | 7   | 0.5   |
| 3                              | 2   | 0.14  |
| Pulpal involvement (any)       | 138 | 9.87  |
| Pulpal involvement (number)    |     |       |
| 1                              | 92  | 6.58  |
| 2                              | 30  | 2.15  |
| 3                              | 10  | 0.72  |
| 4                              | 6   | 0.43  |
| Swelling (any)                 | 6   | 0.43  |
| Swelling (number)              |     |       |
| 1                              | 5   | 0.36  |
| 2                              | 1   | 0.07  |
| Total fistula, swelling, or PI | 171 | 12.23 |
| Untreated dental caries        | 380 | 27.18 |



Pathology for the analytic sample after pandemic restrictions were lifted (Table 4) shows that over 12% of subjects presented with either new fistula, swelling on any tooth, or pulpal involvement. The most prevalent clinical concern was pulpal involvement (N=138, 10%), followed by fistula (N=61, 4%) and swelling (N=6, less than 1%). Over 27% of children presented with untreated dental caries. Stratified by treatment group in CariedAway (Table 5), there were 85 cases of fistula, swelling, or pulpal involvement in the group receiving silver diamine fluoride (N=611) and 86 receiving dental sealants (N=787), for a risk difference of 0.30 (95% CI = -.005, .065). Similarly, there were 165 subjects with untreated decay in the SDF group (N=611) and 215 subjects with untreated decay in the sealant group (N=787). The risk difference for untreated caries was -.003 (95% CI = -.050, .044).

Table 5: Risk difference in severe disease post-pandemic, by treatment (N=1398)

|                              | SDF | Sealants | Risk Diff | 95% CI      |
|------------------------------|-----|----------|-----------|-------------|
| Fistula/swelling/pupal (FSP) | 85  | 86       |           |             |
| No FSP                       | 526 | 701      | 0.0298    | -.005, .065 |
| Caries                       | 165 | 215      |           |             |
| No caries                    | 446 | 572      | -0.0031   | -.050, .044 |

## 4 Discussion

School-based dental programs are effective and cost-efficient methods to increase access to care for vulnerable, traditionally underserved populations [17, 11, 18] and can significantly reduce the risk of disease [19, 20]. Closures of school-based health programs can exacerbate unmet needs in vulnerable populations. We showed that suspension of a school-based caries prevention program due to a global pandemic resulted in an increase in severe disease.

The observed baseline prevalence of untreated caries and dental sealants indicate a lack of access to, or utilization of, traditional dental services and is consistent with the extant literature. In an assessment of children participating in a school-based sealant program in Massachusetts, approximately one third had untreated caries despite living in close proximity to community dental clinics [21] and nearly two-thirds of children had no clinical indication of prior treatment with sealants on permanent dentition [21]. The fact that dental fillings were observed in three times as many CariedAway subjects as sealants indicate that the majority of care, when provided, was for caries management and not prevention. As a result, school-based health programs likely serve as the predominant source of caries prevention for this population.

In New York City, dental offices were closed in June 2020 except for emergency care and all school-based health programs were suspended from March

2020 through August 2021. Although dental offices were soon authorized to reopen with stringent infection control policies, dental care access during the pandemic was significantly reduced [22]. In CariedAway, follow-up observation with study subjects after pandemic restrictions were lifted showed that over 12% had fistula, swelling, or pulpal involvement that were not treated while the project was suspended. This supplements other findings: post-pandemic, children were more likely to have poor oral health and a lower utilization of dental visits, specifically preventive ones [23], and a survey of primary schools in Virginia concluded that the largest decline in school health services due to the pandemic were reported for dental screenings and dental services [24]. In contrast, SBHCs that remained open for clinical care during the pandemic increased annual preventive health exams and were a critical source of primary care to vulnerable populations [25].

Actual versus perceived availability of affordable dental health options may further exacerbate oral disease inequities in urban school children. Approximately 4600 dental providers were previously listed that operated in New York, treated children, and accepted both Medicaid and the Children’s Health Insurance Program. However, 90% of these providers were located in a small number of counties, and a substantial proportion of listings for providers were invalid [26]. As a result, children from low-income households may not have the support necessary to treat urgent needs outside of school-based dental care.

With special considerations, school-based caries prevention can serve as an alternative model for dental care during viral outbreaks. A primary concern regarding dental clinic operation during COVID-19 was due to the potential airborne transmission of the virus and the utilization of aerosol-generating procedures. While traditional dental sealants are historically aerosol-generating, other minimally invasive techniques such as silver diamine fluoride, as implemented in CariedAway, can be used in a non-aerosolized way [27, 28] and form part of a Safer Aerosol-Free Emergent Dentistry (SAFER) approach [29]. Indeed, the risk difference of fistula, swelling, or pulpal involvement and untreated caries was not significantly different between children receiving SDF or dental sealants in CariedAway, indicating that the primary driver of unmet need was lack of access. Proper communication regarding the mitigation of infection in a school-based program can potentially increase access to critical dental care during pandemic periods.

## 5 Additional information

### 5.1 Funding

Research reported in this publication was funded through a Patient-Centered Outcomes Research Institute (PCORI) award (PCS-1609-36824). The content is solely the responsibility of the authors and does not necessarily reflect the official views of the funding organization, New York University, or the NYU College of Dentistry.

## 5.2 Author contributions

RRR was a principal investigator and conceived of and designed the study. TBG served as the supervising dentist, directed clinical activities, and oversaw all data collection. RW, TM, NSG, and PS were involved in the conduct and management of CariedAway, including study coordination, enrollment, community engagement, provision of treatments, and data collection. RRR performed all statistical analyses and wrote the manuscript. All authors critically reviewed the manuscript and provided edits. All authors read and approved the final manuscript.

## 5.3 Availability of Data and Materials

The datasets generated and/or analysed during the current study are not publicly available, but are available from the corresponding author on reasonable request.

## References

- [1] R. M. Benjamin. Oral health: the silent epidemic. *Public Health Rep*, 125(2):158–159, 2010.
- [2] D. Duangthip and C. H. Chu. Challenges in Oral Hygiene and Oral Health Policy. *Front Oral Health*, 1:575428, 2020.
- [3] M. A. Peres, L. M. D. Macpherson, R. J. Weyant, B. Daly, R. Venturelli, M. R. Mathur, S. Listl, R. K. Celeste, C. C. Guarnizo-Herreño, C. Kearns, H. Benizian, P. Allison, and R. G. Watt. Oral diseases: a global public health challenge. *Lancet*, 394(10194):249–260, Jul 2019.
- [4] N. R. Aimee, A. J. van Wijk, M. Maltz, M. M. Varjao, H. D. Mestrinho, and J. C. Carvalho. Dental caries, fluorosis, oral health determinants, and quality of life in adolescents. *Clin Oral Investig*, 21(5):1811–1820, 2017.
- [5] R. R. Ruff, S. Senthil, S. R. Susser, and A. Tsutsui. Oral health, academic performance, and school absenteeism in children and adolescents: A systematic review and meta-analysis. *J Am Dent Assoc*, 150(2):111–121 e4, 2019.
- [6] M. E. Northridge, A. Kumar, and R. Kaur. Disparities in Access to Oral Health Care. *Annu Rev Public Health*, 41:513–535, Apr 2020.
- [7] A. M. Kranz, A. Chen, G. Gahlon, and B. D. Stein. 2020 trends in dental office visits during the COVID-19 pandemic. *J Am Dent Assoc*, 152(7):535–541, Jul 2021.
- [8] Virginia Dickson-Swift, Tejashree Kangutkar, Ron Knevel, and Sarah Down. The impact of covid-19 on individual oral health: a scoping review. *BMC Oral Health*, 22(1):422, 2022.

- [9] M. Arenson, P. J. Hudson, N. Lee, and B. Lai. The Evidence on School-Based Health Centers: A Review. *Glob Pediatr Health*, 6:2333794X19828745, 2019.
- [10] School-based health centers in new york state, Jul 2021.
- [11] S. O. Griffin, S. Naavaal, C. Scherrer, M. Patel, S. Chattopadhyay, and Force Community Preventive Services Task. Evaluation of school-based dental sealant programs: An updated community guide systematic economic review. *Am J Prev Med*, 52(3):407–415, 2017.
- [12] R. R. Ruff, T. Barry-Godin, and R. Niederman. Effect of Silver Diamine Fluoride on Caries Arrest and Prevention: The CariedAway School-Based Randomized Clinical Trial. *JAMA Netw Open*, 6(2):e2255458, Feb 2023.
- [13] L. n and A. Terepka. School-based health centers during academic disruption: Challenges and opportunity in urban mental health. *Psychol Trauma*, 12(S1):S276–S278, Aug 2020.
- [14] A. Terepka, L. Torres-Pagán, and A. De La Fuente. Schools on the front lines: School based health centers amidst covid-19. *Sch Psychol*, 36(5):398–409, 2021.
- [15] R. R. Ruff and R. Niederman. Silver diamine fluoride versus therapeutic sealants for the arrest and prevention of dental caries in low-income minority children: study protocol for a cluster randomized controlled trial. *Trials*, 19(1):523, 2018.
- [16] K. Shivakumar, S. Prasad, and G. Chandu. International Caries Detection and Assessment System: A new paradigm in detection of dental caries. *J Conserv Dent*, 12(1):10–16, Jan 2009.
- [17] S. O. Griffin, K. Jones, and M. Crespin. Calculating averted caries attributable to school-based sealant programs with a minimal data set. *J Public Health Dent*, 74(3):202–9, 2014.
- [18] Barbara F. Gooch, Susan O. Griffin, Shellie Kolavic Gray, William G. Kohn, R. Gary Rozier, Mark Siegal, Margherita Fontana, Diane Brunson, Nancy Carter, David K. Curtis, Kevin J. Donly, Harold Haering, Lawrence F. Hill, H. Pitts Hinson, Jayanth Kumar, Lewis Lampiris, Mark Mallatt, Daniel M. Meyer, Wanda R. Miller, Susan M. Sanzi-Schaedel, Richard Simonsen, Benedict I. Truman, and Domenick T. Zero. Preventing dental caries through school-based sealant programs. *The Journal of the American Dental Association*, 140(11):1356–1365, 2009.
- [19] J. R. Starr, R. R. Ruff, J. Palmisano, J. M. Goodson, O. M. Bukhari, and R. Niederman. Longitudinal caries prevalence in a comprehensive, multicomponent, school-based prevention program. *J Am Dent Assoc*, 152(3):224–233, 03 2021.

- [20] R. R. Ruff, T. Barry-Godin, and R. Niederman. Effect of silver diamine fluoride on caries arrest and prevention: The cariedaway school-based randomized clinical trial. *JAMA Netw Open*, 6(2):e2255458, 2023.
- [21] M. A. Aldosari, O. M. Bukhari, R. R. Ruff, J. N. Palmisano, H. Nguyen, C. W. Douglass, R. Niederman, and J. R. Starr. Comprehensive, School-Based Preventive Dentistry: Program Details and Students' Unmet Dental Needs. *J Sch Health*, 91(9):761–770, 09 2021.
- [22] M. Moharrami, B. Bohlouli, and M. Amin. Frequency and pattern of outpatient dental visits during the COVID-19 pandemic at hospital and community clinics. *J Am Dent Assoc*, 153(4):354–364, 04 2022.
- [23] W. Lyu and G. L. Wehby. Effects of the COVID-19 pandemic on children's oral health and oral health care use. *J Am Dent Assoc*, Feb 2022.
- [24] A. M. Kranz, E. D. Steiner, and J. M. Mitchell. School-Based Health Services in Virginia and the COVID-19 Pandemic. *J Sch Health*, 92(5):436–444, May 2022.
- [25] M. Gallardo, A. Zepeda, C. Biely, N. Jackson, M. Puffer, P. Anton, and R. Dudovitz. School-Based Health Center Utilization During COVID-19 Pandemic-Related School Closures. *J Sch Health*, 92(11):1045–1050, Nov 2022.
- [26] C. H. Chinn, S. Rossy, and E. Best. Analysis of InsureKidsNow.gov dental providers in New York State. *Pediatr Dent*, 35(5):451–455, 2013.
- [27] E. Eden, J. Frencken, S. Gao, J. A. Horst, and N. Innes. Managing dental caries against the backdrop of COVID-19: approaches to reduce aerosol generation. *Br Dent J*, 229(7):411–416, 10 2020.
- [28] R. Singhal, P. Singhal, R. Namdev, and S. Negi. Can silver diamine fluoride be an alternative to aerosol-based dentistry during the COVID scenario? A retrospective analysis. *J Indian Soc Pedod Prev Dent*, 39(3):316–320, 2021.
- [29] H. Benzian and R. Niederman. A Dental Response to the COVID-19 Pandemic-Safer Aerosol-Free Emergent (SAFER) Dentistry. *Front Med (Lausanne)*, 7:520, 2020.
